# Supplementary material for: Formin-induced actin cables are required for polarized recruitment of the Ste5 scaffold and high level activation of MAPK Fus3
Source: Oxford University Press journal article supplement (doi:10.1242/jcs.02418), 2005-06-17
Supplement: jcs02418-sup-figs4.pdf [file jcs02418-sup-figs4.pdf]

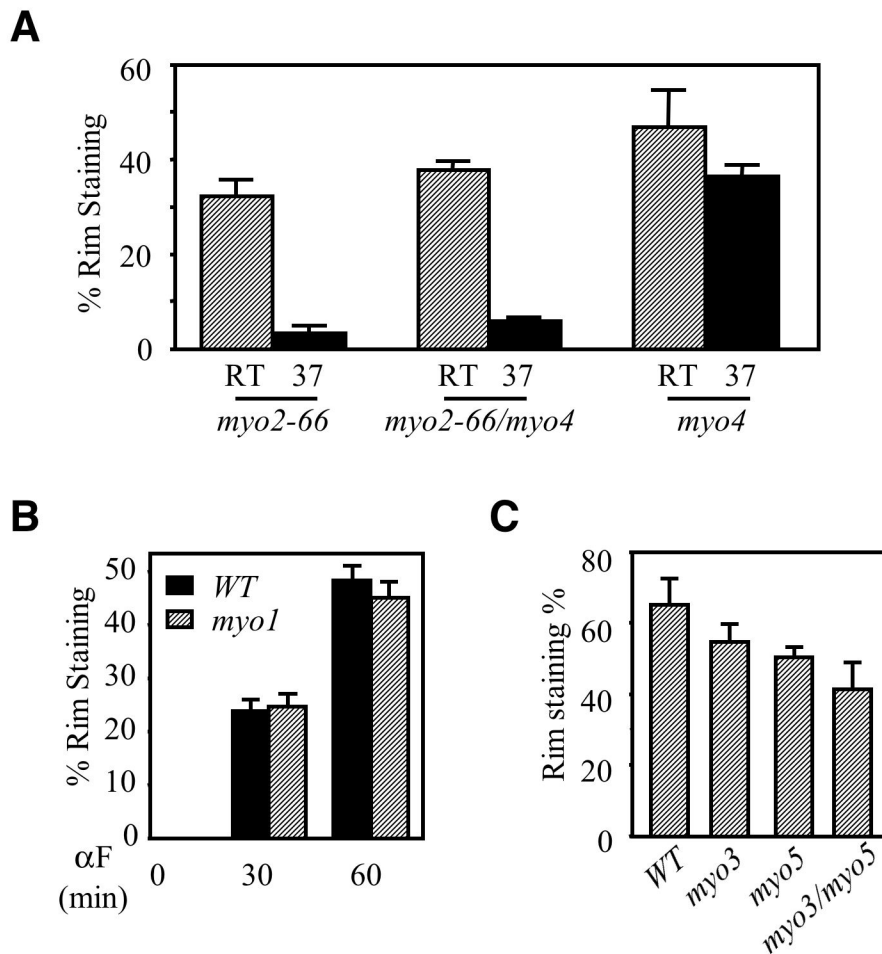

### Fig. S4. Ste5-Myc9 recruitment in *myo* mutants

(A) Ste5-Myc9 localization *myo2-66/myo4* cells. TAgNLSK128TSte5-Myc9 was expressed in *myo2-66* (QMY630), *myo4* (QMY631) and *myo2-66/myo4* (QMY632) strains. The cells were treated as in (Fig. 7A).

(B) Ste5 localization in *myo1* mutants. WT (EY699) and *myo1* (EYL1098) cells expressing Ste5-Myc9 (EYL453) were treated with 5  $\mu$ M  $\alpha$  factor for 30 and 60 minutes, then fixed and treated for indirect immunofluorescence to observe Ste5-Myc9. Ste5-Myc9 rim staining was tallied in over 300 cells.

(C) Ste5-Myc9 recruitment in *myo3* and *myo5* mutants. WT (QMY550), *myo3D* (QMY483), *myo5* (QMY484), or *myo3/myo5* (QMY485) cells expressing Ste5-Myc9 (EBL453) were treated with 5  $\mu$ M  $\alpha$  factor for 60 minutes.
