# Supplementary material for: Formin-induced actin cables are required for polarized recruitment of the Ste5 scaffold and high level activation of MAPK Fus3
Source: Oxford University Press journal article supplement (doi:10.1242/jcs.02418), 2005-06-17
Supplement: jcs02418suptable.pdf [file jcs02418suptable.pdf]

## Supplementary material

### Yeast strains

Strains were grown in rich medium or synthetic medium as described (Guthrie and Fink, 1991).

**Table S1. Yeast strains**

| Strains | Genotype                                                                                                                     | Source       |
|---------|------------------------------------------------------------------------------------------------------------------------------|--------------|
| EY492   | <i>MAT<math>\alpha</math> ura3-1 leu2-3,112 trp1-1 his3-11 ade2-1 can1-100 Gal<sup>+</sup></i>                               | R. Rothstein |
| EY699   | <i>ura3-1 leu2-3,112 trp1-1 his3-11 ade2-1 can1-100 Gal<sup>+</sup></i>                                                      | R. Rothstein |
| EY700   | EY699 <i>fus3-6::LEU2</i>                                                                                                    | E. Elion     |
| EY957   | EY699 <i>sst1</i>                                                                                                            | E. Elion     |
| EY1775  | EY957 <i>ste5::TRP3</i>                                                                                                      | E. Elion     |
| EYL300  | <i>MAT<math>\alpha</math> leu2-3 ura3-52</i>                                                                                 | R. Li        |
| EYL302  | <i>MAT<math>\alpha</math> leu2-3 ura3-52 cdc42-1</i>                                                                         | R. Li        |
| EYL427  | <i>bni1::KAN ura3-1 leu2-3,112 trp1-1 his3-11 ade2-100 ade3</i>                                                              | D. Pellman   |
| EYL428  | <i>bni1::KAN ura3-1 leu2-3,112 trp1-1 his3-11 ade2-100 ade3 MAT<math>\alpha</math></i>                                       | D. Pellman   |
| EYL917  | EYL427 <i>sst1</i>                                                                                                           | B.N. Lee     |
| EYL1096 | <i>sst1::LEU2 FUS3GFP::HIS3 ura3-1 leu3-3,112 trp1-1 his3-11 ade2-1 can1-100</i>                                             | A. Levchenko |
| EYL1098 | <i>myo1::KAN ura3-1 leu2-3,112 trp1-1 his3-11 ade2-1 can1-100 Gal<sup>+</sup></i>                                            | R. Li        |
| EYL1730 | <i>bnr1::KAN ura3-1 leu2-3,112 trp1-1 his3-11 ade2-100</i>                                                                   | D. Pellman   |
| EYL1735 | <i>tpm1-2::LEU2 tpm2::HIS3 his3<math>\Delta</math>-200 leu2-3,112 lys2-801 trp1-1 ura3-52</i>                                | A. Bretscher |
| EYL1736 | <i>tpm2::HIS3 his3<math>\Delta</math>-200 leu2-3,112 lys2-801 trp1-1 ura3-52</i>                                             | A. Bretscher |
| EYL1748 | <i>bni1::BNII#1::HIS3 bnr1::KAN ura3-1 leu2-3,112 trp1-1 his3-11 ade2-100</i>                                                | D. Pellman   |
| EYL1765 | <i>his3<math>\Delta</math>1 leu2<math>\Delta</math>0 met15<math>\Delta</math>0 ura3<math>\Delta</math>0</i>                  | Res Gene     |
| EYL1802 | <i>MAT<math>\alpha</math> MYO2::HIS3 his3-<math>\Delta</math>200 ura3-52 leu2-3,112 lys2-801 ade2-101 Gal<sup>+</sup></i>    | D. Pellman   |
| EYL1807 | <i>MAT<math>\alpha</math> myo2-66::HIS3 his3-<math>\Delta</math>200 ura3-52 leu2-3,112 lys2-801 ade2-101 Gal<sup>+</sup></i> | D. Pellman   |
| QMY27   | <i>sst1::LEU2 bni1::kanR FUS3GFP::HIS3 ura3-1 leu3-3,112 trp1-1 his3-11 ade2-1 can1-100</i>                                  | This study   |
| QMY458  | EYL1802 switched to <i>MAT<math>\alpha</math></i>                                                                            | This study   |
| QMY459  | EYL1807 switched to <i>MAT<math>\alpha</math></i>                                                                            | This study   |

|        |                                                                                                          |            |
|--------|----------------------------------------------------------------------------------------------------------|------------|
| QMY483 | <i>myo3::HIS3 ura3 leu2 trp1 his3 ade2</i>                                                               | R. Li      |
| QMY484 | <i>myo5::TRP1 ura3 leu2 trp1 his3 ade2</i>                                                               | R. Li      |
| QMY485 | <i>myo3::HIS myo5::TRP1 ura3 leu2 trp1 his3 ade2</i>                                                     | R. Li      |
| QMY550 | <i>ura3 leu2 trp1 his3 ade2</i>                                                                          | R. Li      |
| QMY551 | <i>rho1-104 ura3 leu2 trp1 his3 ade2</i>                                                                 | R. Li      |
| QMY553 | <i>rho1::HIS3 rho1-2 LEU2 ura3 leu2 trp1 his3 ade2</i>                                                   | R. Li      |
| QMY574 | <i>rho3::KAN his3Δ1 leu2Δ0 met15Δ0 ura3Δ0</i>                                                            | This study |
| QMY576 | <i>rho5::KAN his3Δ1 leu2Δ0 met15Δ0 ura3Δ0</i>                                                            | This study |
| QMY630 | <i>myo2-66::HIS3</i>                                                                                     | This study |
| QMY631 | <i>myo4::KAN</i>                                                                                         | This study |
| QMY632 | <i>myo2-66::HIS3 myo4::KAN</i>                                                                           | This study |
| 5126   | <i>rho4::KAN his3Δ1 leu2Δ0 met15Δ0 ura3Δ0</i>                                                            | Res Gene   |
| 7230   | <i>rho2::KAN his3Δ1 leu2Δ0 met15Δ0 ura3Δ0</i>                                                            | Res Gene   |
| 22032  | <i>MATa rho5::KAN his3Δ1 leu2Δ0 met15Δ0 ura3Δ0</i><br><i>MATα rho5::KAN his3Δ1 leu2Δ0 met15Δ0 ura3Δ0</i> | Res Gene   |
| 22277  | <i>MATa rho3::KAN his3Δ1 leu2Δ0 met15Δ0 ura3Δ0</i><br><i>MATα rho3::KAN his3Δ1 leu2Δ0 met15Δ0 ura3Δ0</i> | Res Gene   |

---

All strains except EY492, EYL428, 22032 and 22277 are *MATa*.

QMY27 was produced by cross of EYL428 with EYL1096. QMY630-632 were created by crossing EYL1685 with EYL1807 (*she1* is *myo4*). QMY574 and QMY576 were made by sporulation of 22277 and 22032.

### Plasmid construction

All *BNI1* plasmids were made from a pRS316-based vector (PB1025, former name p182, see Evangelista et al., 1997) containing the *BNI1* coding sequence with 800 base pairs (bp) upstream and 1600 bp downstream sequence. The Rho-binding domain deletion mutant, *bni1ΔRBD* (QMB16, deletes aa 90-343), was made from two PCR amplified fragments of *BNI1* using the following primers: -788~268 fragment: 5'-ACGCGGATCCTTCACCGCTTTCGCACCTACTT-3' (*Bam*HI site at 5' terminus), 5'-TCCCCGCGGCGATTTTTTATTCAACGGCCT-3' (*Sac*II site at 3' terminus) and 1031~2472 fragment: 5'-CTACCGCGGCGAATCCTGGCAGACAACTT-3' (*Sac*II site at 5' terminus), 5'-TGCATGTCTCGAGTTCATACCTCTGGTGCCTTC-3'. The PCR products were cut with *Bam*HI/*Sac*II and *Sac*II/*Xho*I respectively, then performed a 3-way ligation with *Bam*HI/*Xho*I vector fragment of PB1025 to produce QMB16. The *Bam*HI/*Xho*I fragment of QMB16 containing *bni1ΔRBD* mutation was inserted into EBL334 to produce QMB79 (*bni1ΔRBD-GFP*). The *bni1ΔFH1FH2* mutant (QBM5, deletes

aa 1230-1748) was made by cloning the *BNII* gene into *Bam*HI-*Eag*I sites of pBR322 to make QMB3. A *BNII* fragment from the *Xho*I site to the FH1 domain (nucleotides 3572-4791) was PCR amplified with primers: 5'-GAACTCGAGCCTA AATTCTTCAG-3' and 5'-AGATCCGCGGCAGTAGAGAGATCTTCTGCG-3' (*Sac*II site at 5' terminus). This PCR product was used to replace the *Xho*I-*Sac*II fragment of *BNII* gene in QMB3 to make QMB4. Then the *Bam*HI-*Eag*I fragment of QMB4 was cloned into pRS316 to make QMB5. To make *bni1ΔFH1* (QMB21, deletes aa 1230-1328), fragment from *Xho*I site to FH1 domain (3572-4791) was PCR amplified by the same way as for FH domain deletion, but added a *Sph*I site instead of *Sac*II site to the second primers: 5'-GATGCATGCAGTAGAGAGAT CTTCTGCG-3'. Fragment from the end of FH1 to *Sac*II site (5086-6352) were PCR amplified with 5' primer: 5'-CATGCATGCGCATCGCAAATCAAATCAGCT-3' (*Sph*I site at 5' terminus) and 3' primer: 5'-CTTCCGCGGCTAGATTTTGCCTT-3'. The first and second PCR products were digested with *Xho*I/*Sph*I and *Sph*I/*Sac*II respectively, then used in a 3-way ligation with the *Xho*I/*Sac*II fragment of QMB3 to make QMB19. The *Bam*HI-*Eag*I fragments of QMB19 was cloned into pRS316 to make QMB21. The same strategy was used to make *bni1ΔFH2* (QMB22, deletes aa 1492-1640), except a different 3' primer (5'-TGTAGCATGCCCTCACGCC CTCCAGTCTG-3') for the first PCR, which amplifies fragment from *Xho*I site to FH2 domain (3572-5577), and a different 5' primers (5'-CGATGCATGCTCCATTGAGCAGTTAGTTAA-3') for the second PCR, which amplifies fragment from the end of FH2 domain to *Sac*II site (6021-6352). QMB34 (*bni1ΔCT*, deletes aa 1749-1953) was made by cloning *Bam*HI-*Eag*I fragment of PB1046 (Lee et al., 1999) into pRS315.

**Table S2. Plasmids used in this study**

| Plasmids | Description         | Source                       |                       |
|----------|---------------------|------------------------------|-----------------------|
| QMB5     | <i>bni1ΔFH1FH2</i>  | <i>CEN</i> <i>URA3</i>       | This study            |
| QMB16    | <i>bni1ΔRBD</i>     | <i>CEN</i> <i>URA3</i>       | This study            |
| QMB21    | <i>bni1ΔFH1</i>     | <i>CEN</i> <i>URA3</i>       | This study            |
| QMB22    | <i>bni1ΔFH2</i>     | <i>CEN</i> <i>URA3</i>       | This study            |
| QMB34    | <i>bni1ΔCT</i>      | <i>CEN</i> <i>LEU2</i>       | This study            |
| QMB75    | <i>MYO2DN</i>       | <i>GAL1</i> <i>LEU2</i>      | S. Reck-Peterson      |
| QMB79    | <i>bni1ΔRBD-GFP</i> | <i>CEN(ADH1)</i> <i>URA3</i> | This study            |
| QMB80    | <i>MYO2-HA</i>      | <i>CEN</i> <i>HIS3</i>       | L. Weisman            |
| EBL95    | <i>FUS1-LACZ</i>    | <i>2</i> <i>LEU2</i>         | Elion et al. (1990)   |
| EBL204   | <i>STE5-CTM</i>     | <i>CEN(GAL1)</i> <i>LEU2</i> | Pryciak et al. (1998) |

|          |                                       |                  |             |                              |
|----------|---------------------------------------|------------------|-------------|------------------------------|
| EBL284   | <i>STE11-4</i>                        | <i>CEN</i>       | <i>HIS3</i> | H. Madhani                   |
| EBL332   | <i>BNI1-HA4</i>                       | <i>CEN</i>       | <i>URA3</i> | D. Pellman                   |
| EBL334   | <i>BNI1-GFP</i>                       | <i>CEN(ADH1)</i> | <i>URA3</i> | D. Pellman                   |
| EBL358   | <i>STE5-MYC9</i>                      | <i>CEN</i>       | <i>URA3</i> | Mahanty <i>et al.</i> (1999) |
| EBL365   | <i>STE5-MYC9</i>                      | <i>2</i>         | <i>URA3</i> | Mahanty <i>et al.</i> (1999) |
| EBL367   | <i>STE5-GFP</i>                       | <i>CEN(CUP1)</i> | <i>URA3</i> | Mahanty <i>et al.</i> (1999) |
| EBL444   | <i>TAgNLS<sup>K128T</sup>-STE5-M9</i> | <i>2</i>         | <i>URA3</i> | Mahanty <i>et al.</i> (1999) |
| EBL453   | <i>STE5-MYC9</i>                      | <i>2</i>         | <i>LEU2</i> | Mahanty <i>et al.</i> (1999) |
| EBL511   | <i>GFP-STE20</i>                      | <i>CEN</i>       | <i>URA3</i> | Leberer <i>et al.</i> (1997) |
| EBL664   | <i>GFP-CDC24</i>                      | <i>CEN(MET)</i>  | <i>LEU2</i> | Toenjes <i>et al.</i> (1999) |
| PYEE1102 | <i>FUS3-HA</i>                        | <i>CEN</i>       | <i>HIS3</i> | Elion <i>et al.</i> (1993)   |

### Supplemental References

**Elion, E.A., Grisafi, P.L. and Fink, G.R.** (1990). FUS3 encodes a *cdc2+*/CDC28-related kinase required for the transition from mitosis into conjugation. *Cell*. **60**, 649-664.

**Guthrie, C. and Fink, G.R.** (1991). Guide to yeast genetics and molecular biology. *Methods Enzymol.* **194**, 1-933.

**Lee, L., Klee, S.K., Evangelista, M., Boone, C. and Pellman, D.** (1999). Control of mitotic spindle position by the *Saccharomyces cerevisiae* formin Bni1p. *J. Cell Biol.* **144**, 947-961.
